# Supplementary material for: Neuroprotective Properties of Cardoon Leaves Extracts against Neurodevelopmental Deficits in an In Vitro Model of Rett Syndrome Depend on the Extraction Method and Harvest Time
Source: MDPI journal article supplement (doi:10.3390/molecules27248772), 2022-12-10
Supplement: s1 [file s1]

# Neuroprotective properties of cardoon leaves extracts against neurodevelopmental deficits in an in vitro model of Rett syndrome depend on the extraction method and harvest time

Mariachiara Spennato <sup>1</sup>, Ottavia Maria Roggero <sup>2</sup>, Simona Varriale <sup>3</sup>, Fioretta Asaro <sup>1</sup>, Angelo Cortesi <sup>4</sup>, Jan Kašpar <sup>1</sup>, Enrico Tongiorgi <sup>2</sup>, Cinzia Pezzella <sup>3</sup> and Lucia Gardossi <sup>1,\*</sup>

<sup>1</sup> Department of Chemical and Pharmaceutical Sciences, University of Trieste, Via L. Giorgieri 1, 34127 Trieste, Italy

<sup>2</sup> Department of Life Sciences, University of Trieste, Via L. Giorgieri 5, 34127 Trieste, Italy

<sup>3</sup> Department of Chemical Sciences, University Federico II of Naples, Via Cinthia, 4, 80126 Napoli, Italy

<sup>4</sup> Department of Engineering and Architecture, University of Trieste, Via Alfonso Valerio 6/A, 34127 Trieste, Italy

\* Correspondence: gardossi@units.it

## Supplementary Information (SI)

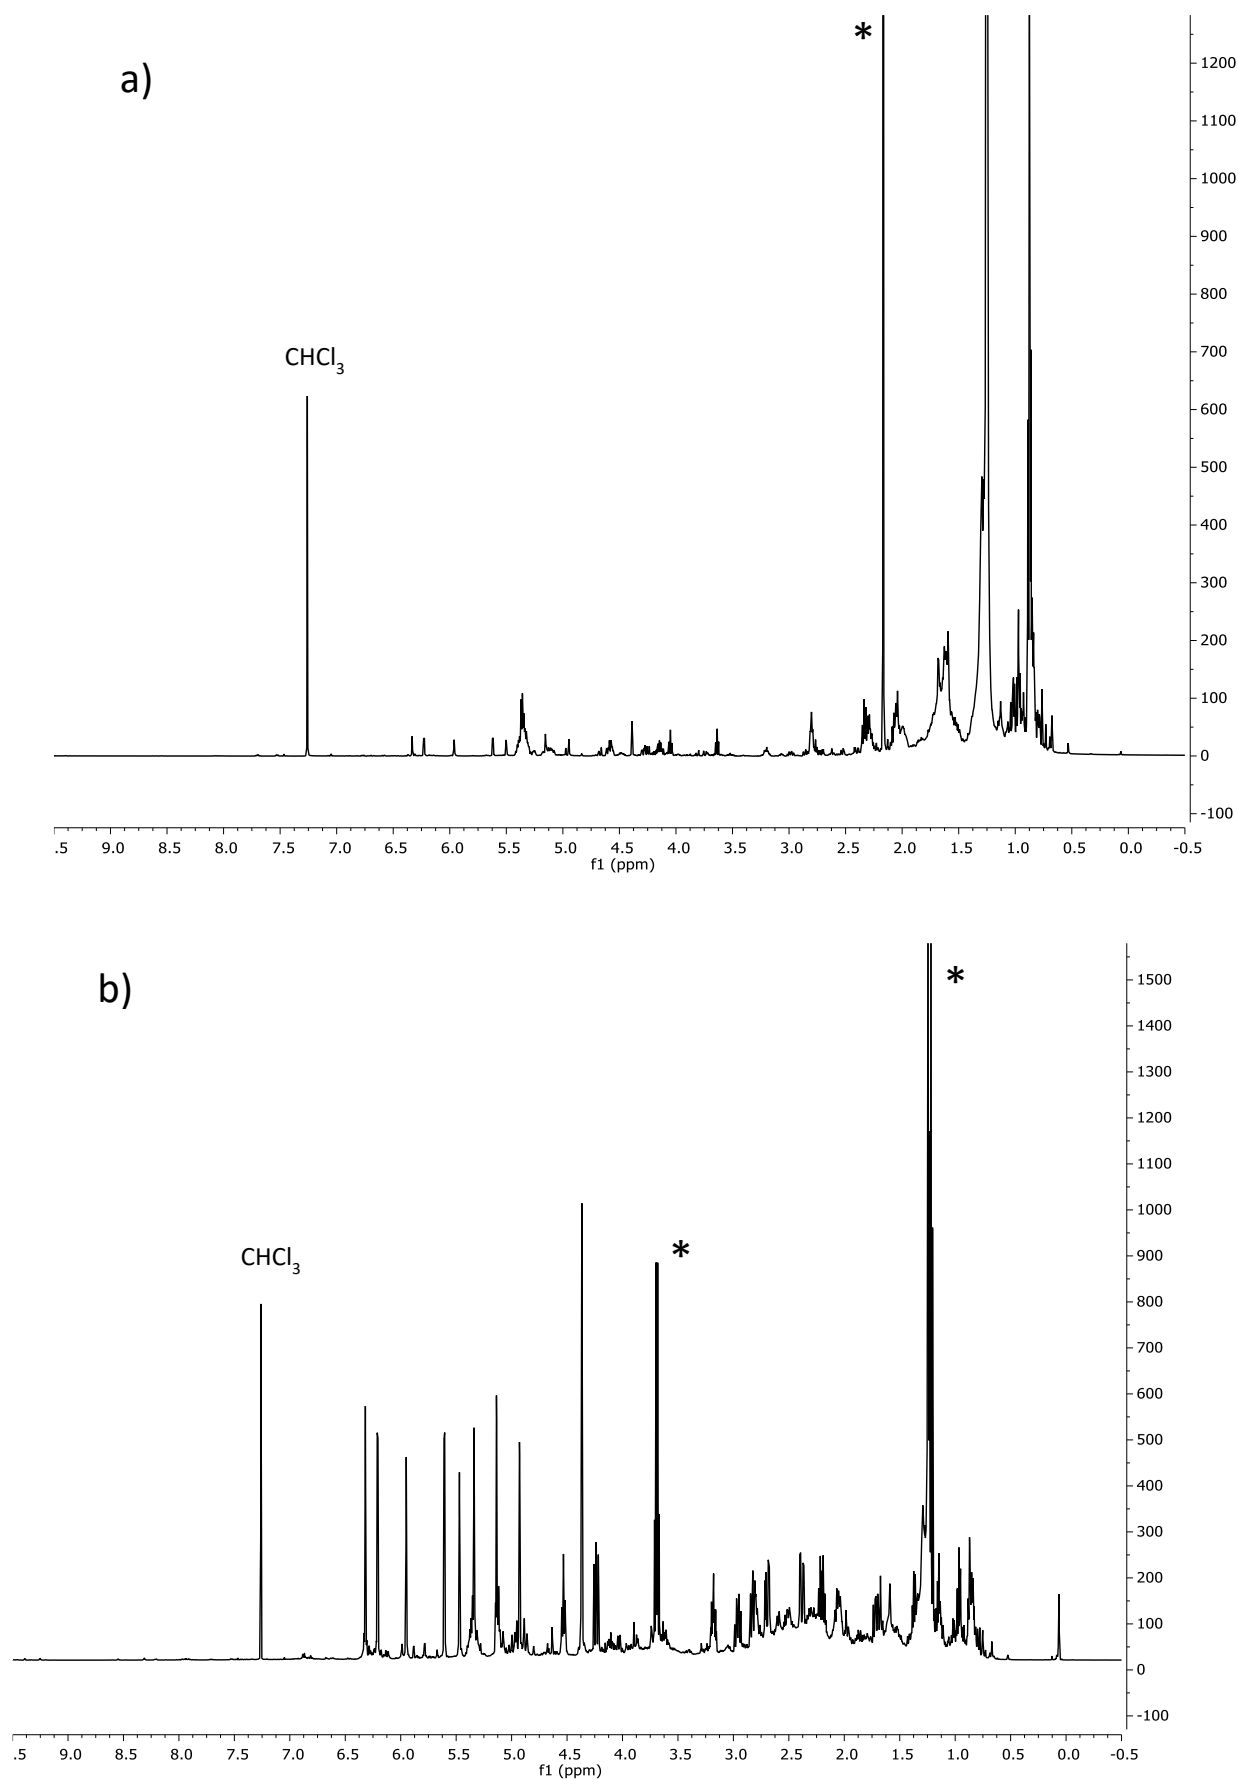

**Figure S1.**  $^1\text{H}$ -NMR (500 MHz,  $\text{CDCl}_3$ ) spectrum of the CLE a)  $\text{scCO}_2\text{Au}$ ; b) NaviglioSp.  $\delta$ : 0.53 - $\text{CH}_3$  of sterols;  $\delta$ : 0.71 - $\text{CH}_2$  of triterpenes;  $\delta$ : 0.85-0.96 - $\text{CH}_3$  alkyl chains;  $\delta$ : 1.30-1.22 - $\text{CH}_2$  of alkyl chains;  $\delta$ : 1.59 - $\text{CH}_2\text{CH}_2\text{COOH}$  of fatty acids;  $\delta$ : 2.16 - $\text{CH}_2\text{-CH=CH-}$ ;  $\delta$ : 2.21 - $\text{CH}_2\text{COOH}$  of fatty acids;  $\delta$ : 4.61-4.54 signals of lupeol;  $\delta$ : 4.65-4.67 signal of taraxerol,  $\delta$ : 4.27, 4.48, 4.94, 5.14, 6.33, 6.22, 5.95, 5.61, 5.49 typical signals of cynaropicrin as reported in the main manuscript; \* denotes solvents (Acetone-Ethanol, respectively in a) and b)).

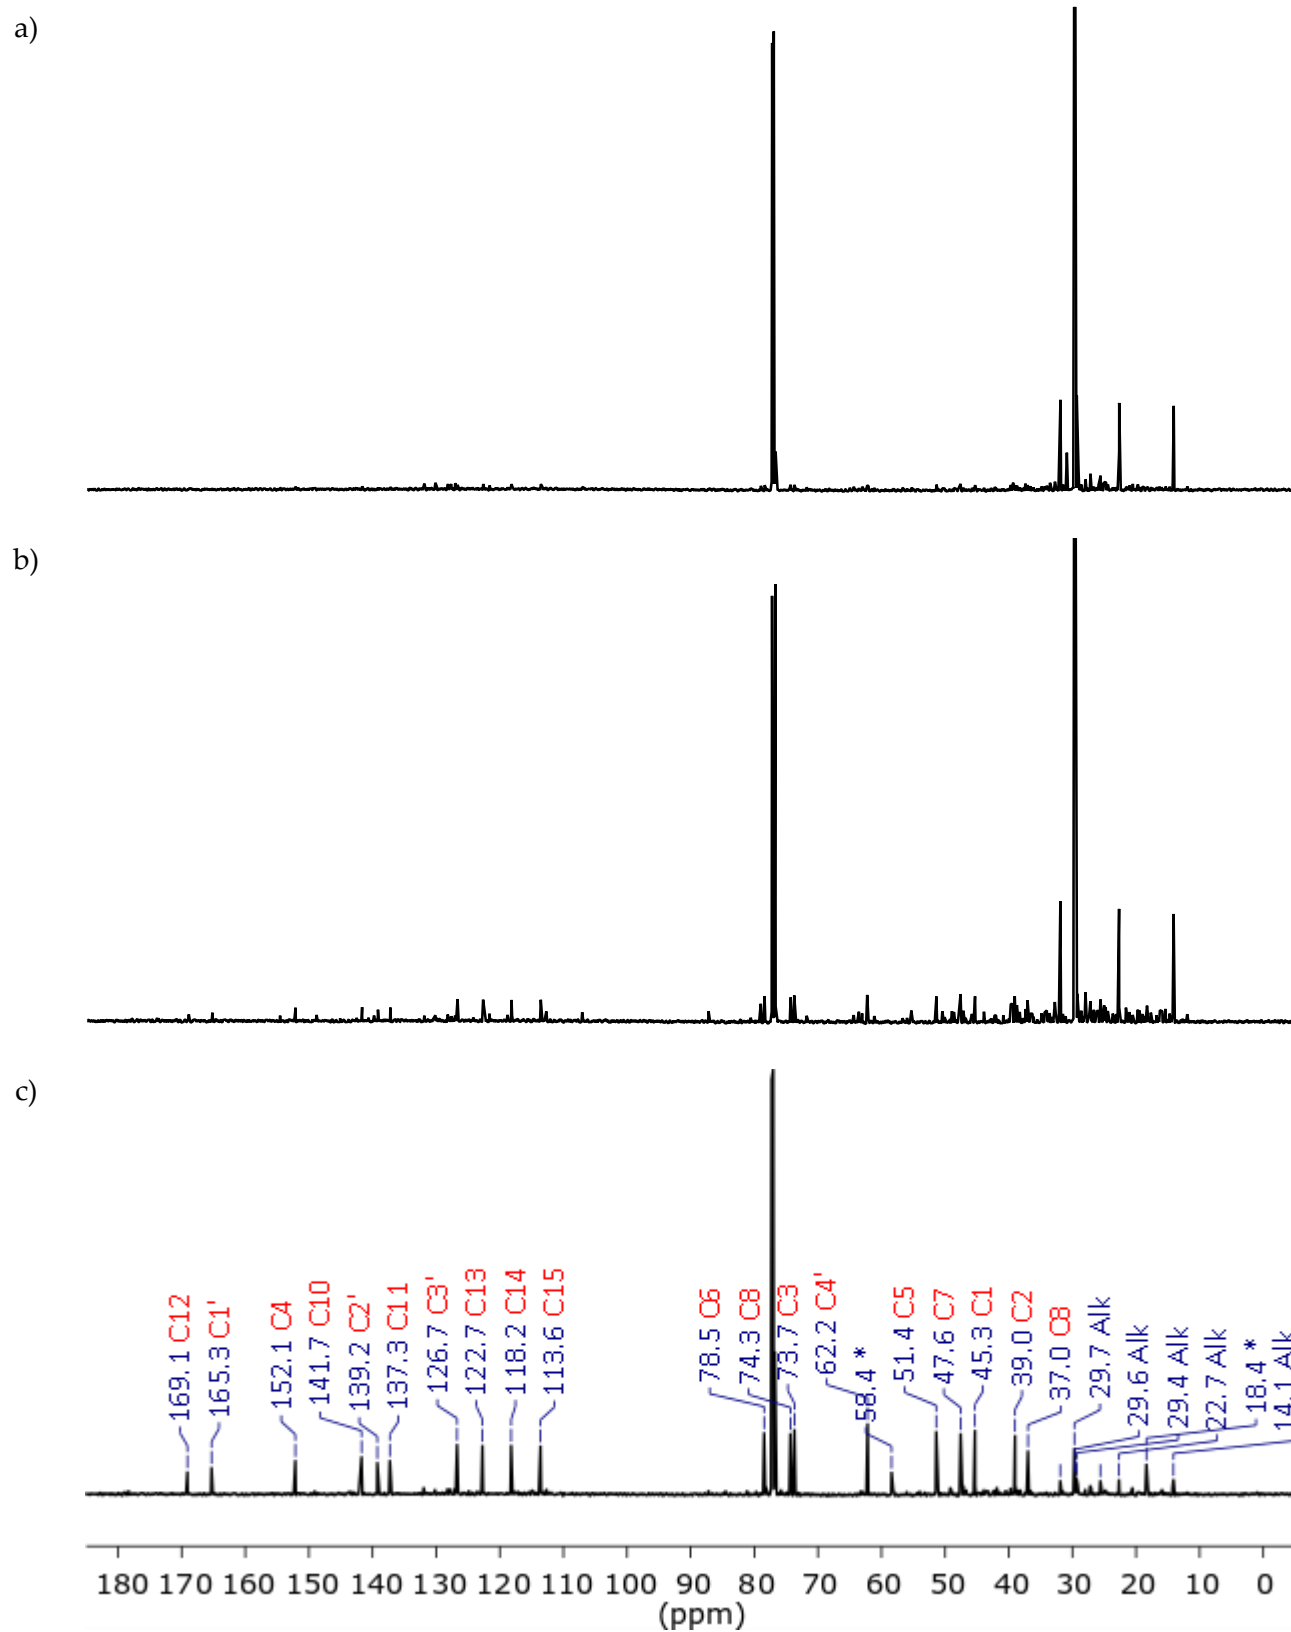

**Figure S2.** <sup>13</sup>C NMR spectra from samples: a) scCO<sub>2</sub>Au, b) scCO<sub>2</sub>Sp, c) NaviglioSp. On the last spectrum is reported the assignment of the signal of cynaropicrin and paraffins, carried out on the basis of literature data [1,2]. The asterisks mark the peaks of residual EtOH.

a) Cynaropicrin

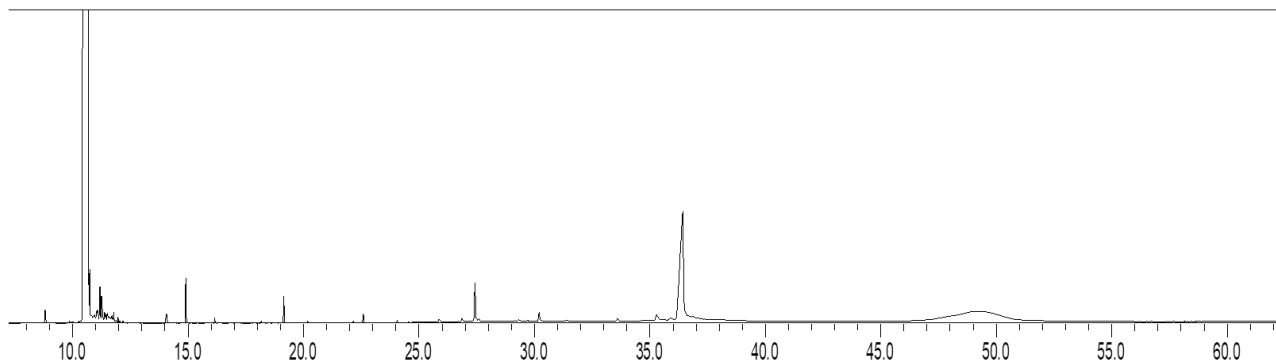

| Peak Report TIC |        |        |        |           |        |          |         |       |      |                                             |
|-----------------|--------|--------|--------|-----------|--------|----------|---------|-------|------|---------------------------------------------|
| Peak#           | R.Time | I.Time | F.Time | Area      | Area%  | Height   | Height% | A/H   | Mark | Name                                        |
| 1               | 10.675 | 10.233 | 10.833 | 736963593 | 91.77  | 53775329 | 83.82   | 13.70 | MI   | Dodecane, 2,6,11-trimethyl-                 |
| 2               | 14.058 | 13.850 | 14.267 | 1384516   | 0.17   | 406226   | 0.63    | 3.41  | MI   | Cycloheptasiloxane, tetradecamethyl-        |
| 3               | 14.899 | 14.700 | 15.100 | 3183564   | 0.40   | 1942007  | 3.03    | 1.64  | MI   | Butylated Hydroxytoluene                    |
| 4               | 19.146 | 18.917 | 19.383 | 2431715   | 0.30   | 1145068  | 1.78    | 2.12  | MI   | Tributyrin                                  |
| 5               | 27.419 | 27.283 | 27.700 | 5524401   | 0.69   | 1636659  | 2.55    | 3.38  | MI   | Andrographolide                             |
| 6               | 30.198 | 30.067 | 30.383 | 1360961   | 0.17   | 381953   | 0.60    | 3.56  | MI   | m-Canphorene                                |
| 7               | 35.288 | 35.100 | 35.467 | 1456665   | 0.18   | 219306   | 0.34    | 6.64  | MI   | 1H-Cyclopropa[3,4]benz[1,2-e]azulene-5,7b,5 |
| 8               | 36.415 | 36.017 | 37.050 | 50729625  | 6.32   | 4648014  | 7.25    | 10.91 | MI   | Cynaropicrin                                |
|                 |        |        |        | 803035040 | 100.00 | 64154562 | 100.00  |       |      |                                             |

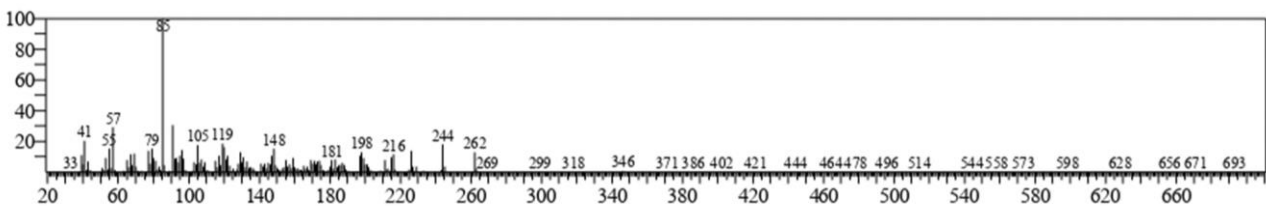

b) Squalene

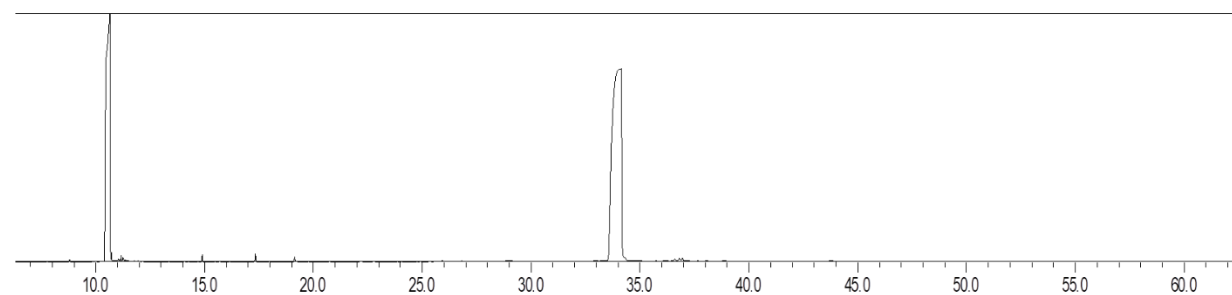

| Peak Report TIC |        |        |        |            |        |          |         |       |      |                                    |
|-----------------|--------|--------|--------|------------|--------|----------|---------|-------|------|------------------------------------|
| Peak#           | R.Time | I.Time | F.Time | Area       | Area%  | Height   | Height% | A/H   | Mark | Name                               |
| 1               | 10.642 | 10.217 | 11.050 | 622502702  | 34.89  | 50778812 | 56.14   | 12.26 | MI   | Dodecane                           |
| 2               | 28.950 | 28.567 | 29.583 | 3235480    | 0.18   | 178254   | 0.20    | 18.15 | MI   | D-A-Friedoleanan-3-ol, (3.alpha.)- |
| 3               | 34.142 | 33.133 | 34.650 | 1158575312 | 64.93  | 39493858 | 43.66   | 29.34 | MI   |                                    |
|                 |        |        |        | 1784313494 | 100.00 | 90450924 | 100.00  |       |      |                                    |

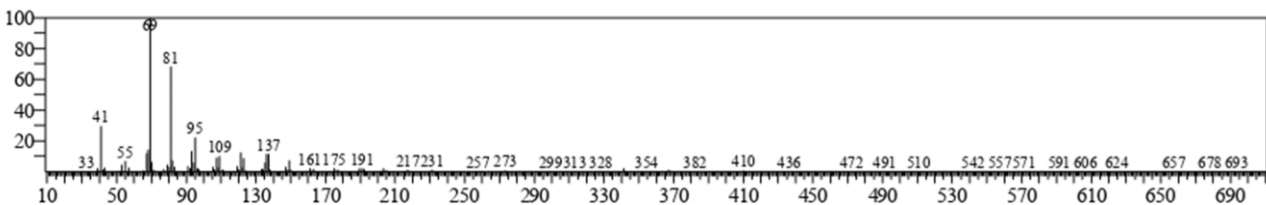

### c) Taraxerol

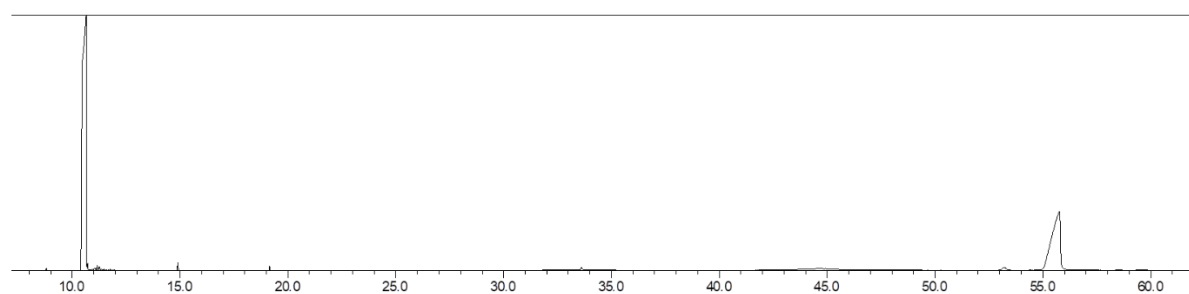

| Peak Report TIC |        |        |        |           |        |          |         |       |      |
|-----------------|--------|--------|--------|-----------|--------|----------|---------|-------|------|
| Peak#           | R.Time | I.Time | F.Time | Area      | Area%  | Height   | Height% | A/H   | Mark |
| 1               | 10.642 | 10.217 | 10.933 | 621463513 | 65.41  | 50729672 | 80.65   | 12.25 | MI   |
| 2               | 53.197 | 52.767 | 53.600 | 7580568   | 0.80   | 536591   | 0.85    | 14.13 | MI   |
| 3               | 55.760 | 54.633 | 56.200 | 321051979 | 33.79  | 11633306 | 18.50   | 27.60 | MI   |
|                 |        |        |        | 950096060 | 100.00 | 62899569 | 100.00  |       |      |

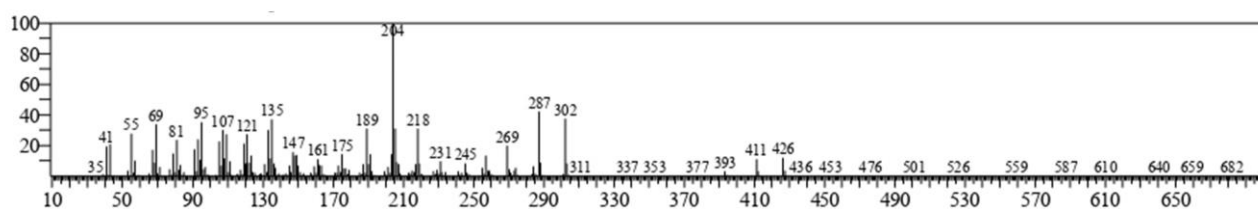

### d) Lupeol

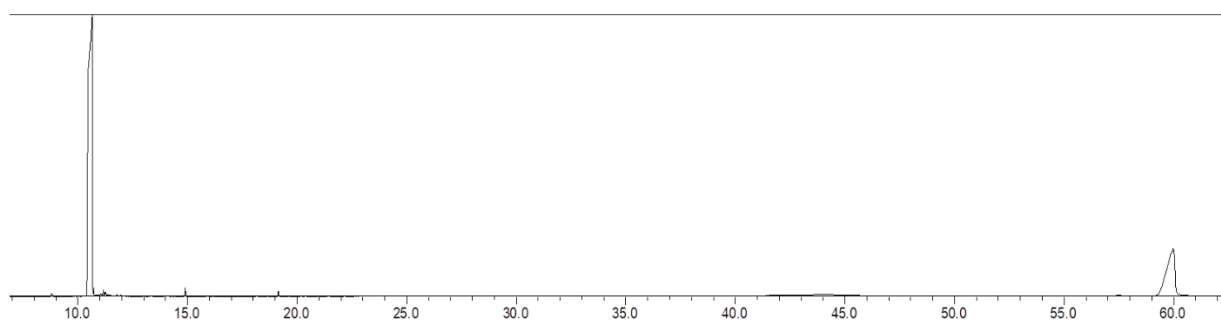

| Peak Report TIC |        |        |        |           |        |          |         |       |      |
|-----------------|--------|--------|--------|-----------|--------|----------|---------|-------|------|
| Peak#           | R.Time | I.Time | F.Time | Area      | Area%  | Height   | Height% | A/H   | Mark |
| 1               | 10.642 | 9.867  | 10.850 | 622601923 | 73.41  | 51251486 | 85.59   | 12.15 | MI   |
| 2               | 59.970 | 58.750 | 60.717 | 225557845 | 26.59  | 8631350  | 14.41   | 26.13 | MI   |
|                 |        |        |        | 848159768 | 100.00 | 59882836 | 100.00  |       |      |

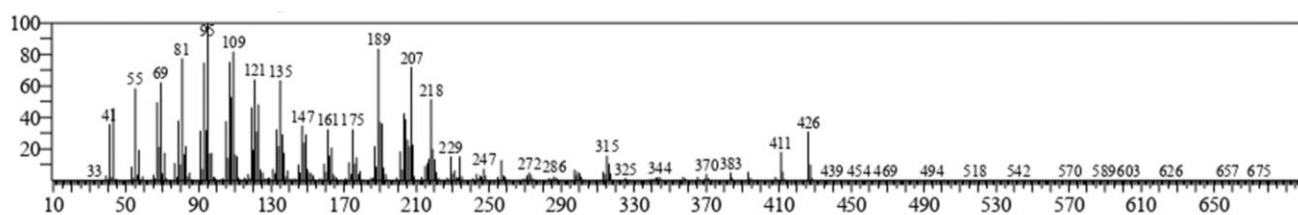

**Figure S3.** GC-MS chromatograms and fragmentations of bioactive molecules. a) cynaropicrin; b) squalene, c) 3 $\beta$ -taraxerol and d) lupeol

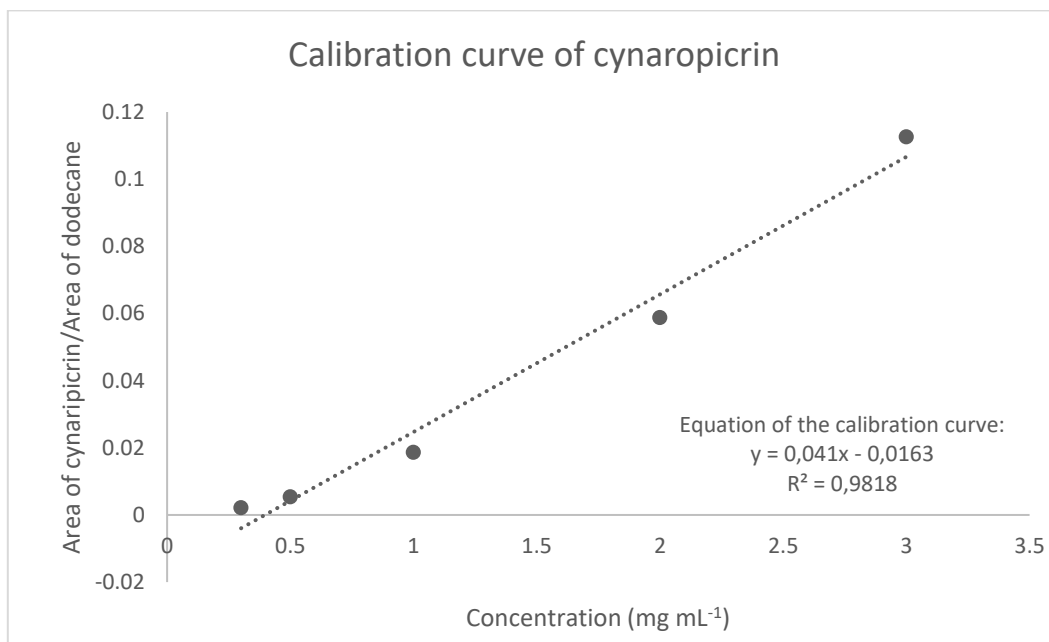

**Figure S4.** GC-MS calibration curve of Cynaropicrin

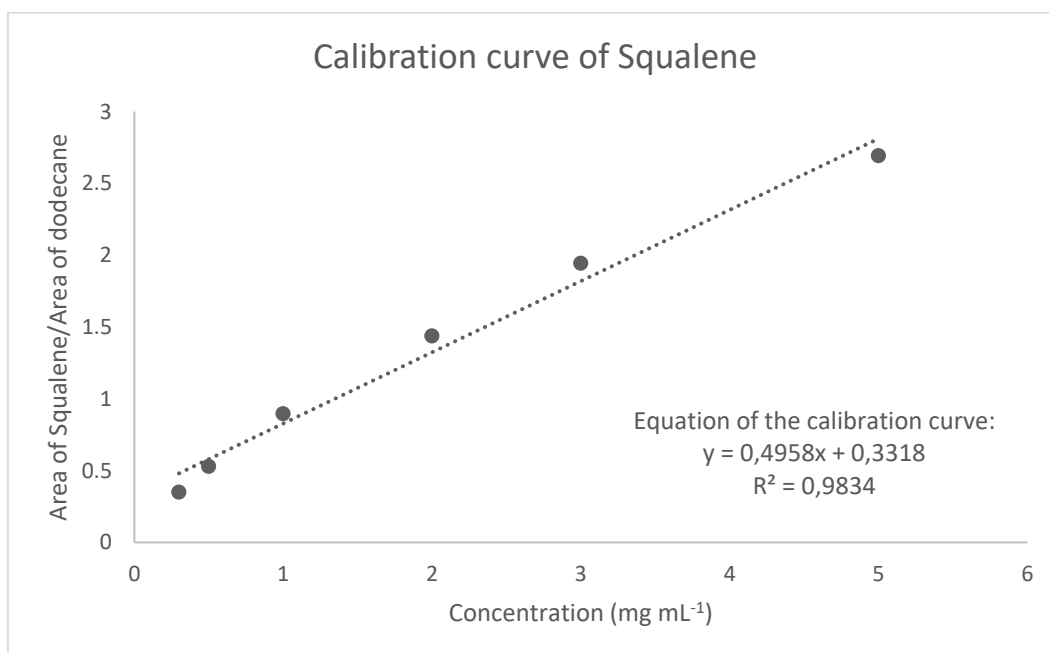

**Figure S5.** GC-MS calibration curve of Squalene

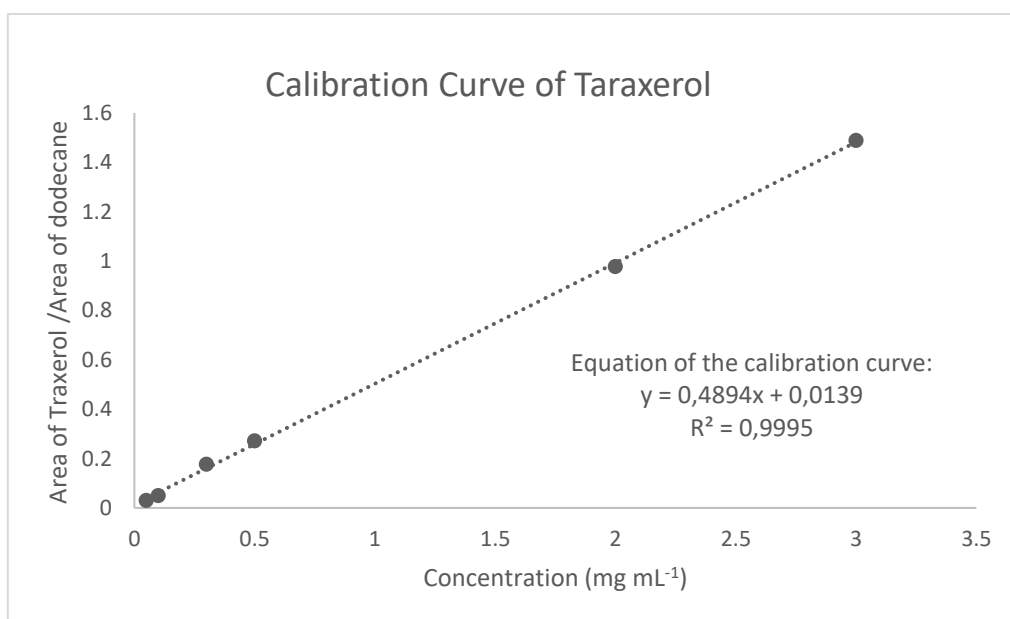

**Figure S6.** GC-MS calibration curve of Taraxerol

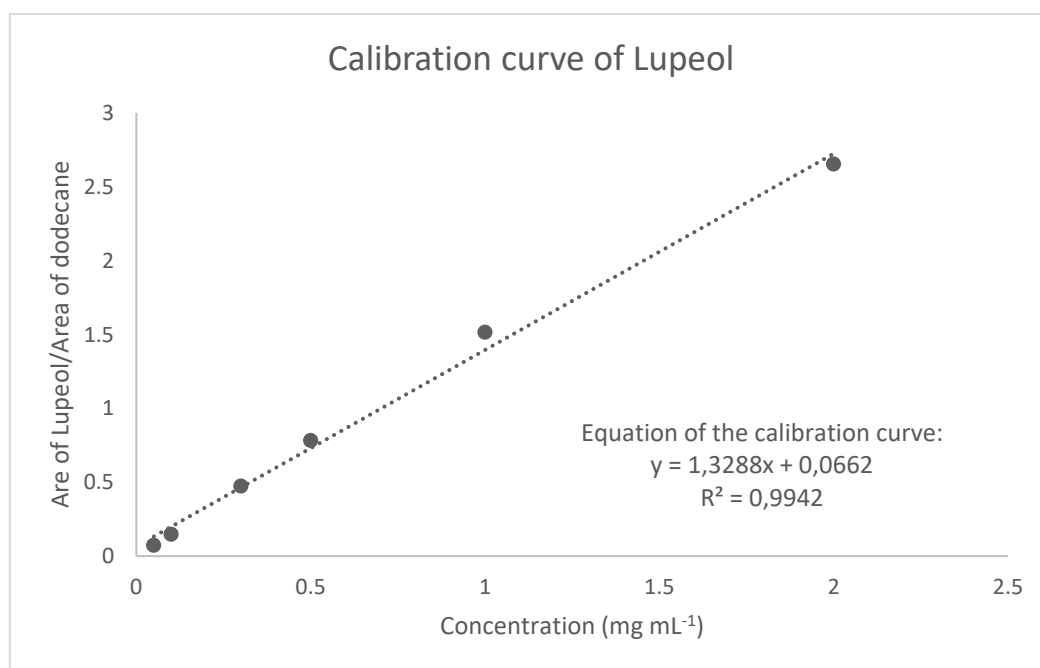

**Figure S7.** GC-MS calibration curve of Lupeol

## References

1. Ramos, P.A.B., Guerra, Â.R., Guerreiro, O., Freire, C.S.R., Silva, A.M.S., Duarte, M.F., Silvestre, A.J.D. Lipophilic Extracts of *Cynara cardunculus* L. var. *altalis* (DC): A Source of Valuable Bioactive Terpenic Compounds. *J. Agric. Food Chem.* **2013**, 61, 8420–8429.
2. Palomino-Schätzlein, M., Escrig, P.V., Boira, H., Primo, J., Pineda-Lucena, A., Cabedo N. Evaluation of nonpolar metabolites in plant extracts by <sup>13</sup>C NMR spectroscopy. *J Agric Food Chem.* **2011**, 59(21), 11407-16.
